# Supplementary material for: Deoxygenation of methyl palmitate over SiO2-supported nickel phosphide catalysts: effects of pressure and kinetic investigation
Source: Royal Society of Chemistry journal article supplement (doi:10.1039/c5ra22973a), 2015-01-01
Supplement: c5ra22973a1.pdf [file c5ra22973a1.pdf]

## Supporting information of Deoxygenation of methyl palmitate over SiO<sub>2</sub>-supported nickel phosphide catalysts: effects of pressure and kinetic investigation

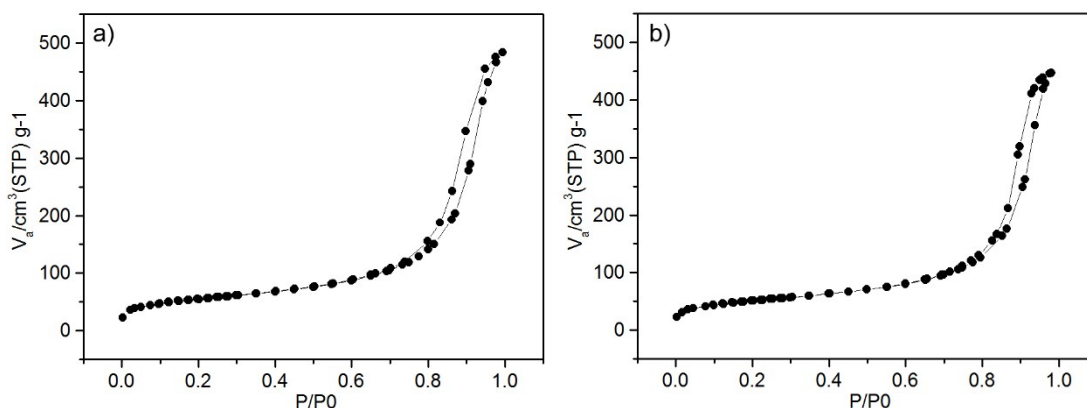

Fig. S1. Adsorption and desorption isotherms of Ni<sub>2</sub>P/SiO<sub>2</sub>. a) fresh, b) used.

| Catalysts          | Ni <sub>2</sub> P/SiO <sub>2</sub> fresh | Ni <sub>2</sub> P/SiO <sub>2</sub> used |
|--------------------|------------------------------------------|-----------------------------------------|
| CO uptake (μmol/g) | 1.4                                      | 1.2                                     |

Table S1 CO uptake of fresh and used catalysts.

| Temperature (°C) | Pressure (MPa) | Palmitic acid (%) | Hexadecanal (%) | Hexadecane (%) | Pentadecane (%) | Pentadecene (%) | Hexadecene (%) |
|------------------|----------------|-------------------|-----------------|----------------|-----------------|-----------------|----------------|
| 270              | 0.1            | trace             | 0.53            | 0.045          | 58.11           | 38.81           | 2.04           |
|                  | 1              | 6.28              | 0.78            | 0.046          | 72.02           | 16.21           | 4.53           |
|                  | 3              | 18.81             | 1.00            | 0.059          | 71.32           | 3.54            | 5.25           |
| 290              | 0.1            | trace             | 0.30            | 0.010          | 37.64           | 58.39           | 2.88           |
|                  | 1              | 2.20              | 0.72            | 0.016          | 81.70           | 8.83            | 5.98           |
|                  | 3              | 4.84              | 0.96            | 0.066          | 84.32           | 2.21            | 7.34           |
| 310              | 0.1            | trace             | 0.12            | 0.067          | 29.77           | 65.68           | 4.28           |
|                  | 1              | 0.56              | 0.51            | 0.055          | 89.23           | 3.97            | 5.39           |
|                  | 3              | 0.86              | 0.48            | 0.034          | 89.34           | 0.44            | 8.65           |

Table S2 Selectivity of product at different reaction temperature and pressure. At all reaction condition, selectivity of hexadecene is trace.
